# Supplementary material for: An ATP-Binding Cassette Transporter, LaABCB11, Contributes to Alkaloid Transport in Lycoris aurea
Source: MDPI journal article supplement (doi:10.3390/ijms222111458), 2021-10-24
Supplement: s1 [file s1]

**Table S1 Primer summarization**

| Primer          | Sequence                                         |
|-----------------|--------------------------------------------------|
| ABCB11-s        | ATGGGTATTGAAGAAGAGAAGG                           |
| ABCB11-a        | CGTAGAAGAATTTGTGTGAA                             |
| RT-s            | TATGACACGGTGGTTGGAGA                             |
| RT-a            | CCACTCGTTCAGATTCAGCA                             |
| <i>TIP41</i> -s | GCAACCATCCAAAGTTTAACTGCT                         |
| <i>TIP41</i> -a | AATGTGCAAGCAGGGCTAGTAA                           |
| 11-1s           | ATGGGTATTGAAGAAGAGAA                             |
| 11-1a           | TCAATCAGACTTATAACTGTGACCAAAGCTACAGTCGTGC         |
| 11-2s           | GCACGACTGTAGCTTTGGTCACAGTTATAAGTCTGATTGA         |
| 11-2a           | GCATCCAAAGCACTGGTGGCTCGTGGGTCTTTCAGAATAG         |
| 11-3s           | CTATTCTGAAAGACCCACGAGCCACCAGTGCTTTGGATGC         |
| 11-3a           | TGTAACAATGCTATCGCAGTAACCAATGCAACAGTCTTTC         |
| 11-4s           | GGAAAGACTGTTGCATTGGTTACTGCGATAGCATTGTTACA        |
| 11-4a           | GCATCGAGCGCGCTTGTTGCTTTTGGCTCTTTCACAATGGC        |
| 11-5s           | CCATTGTGAAAGAGCCAAAAGCAACAAGCGCGCTCGATGC         |
| 11-5a           | CTACGTAGAAGAATTTGTGT                             |
| 196-11-s        | tataccccagcctcgactagtATGGGTATTGAAGAAGAGAAGGACA   |
| 196-11-a        | gataagcttgatatcgaattcCTACGTAGAAGAATTTGTGTGAAGTGC |
| 1301-11-s       | taagtcggagctagctctagaATGGGTATTGAAGAAGAGAAGG      |

|            |                                                        |
|------------|--------------------------------------------------------|
| 1301-11-a  | cgcccttgctcaccatggatccGTAGAAGAATTTGTGTG                |
| probe-s    | GGTTATGACACGGTGGTTGG                                   |
| probe-T7-a | GCGAAATTAATACGACTCACTATAGGGAGAAACCACTGCAA<br>TCACATCGG |
| probe-T7-s | GCGAAATTAATACGACTCACTATAGGGAGAGGTTATGACAC<br>GGTGGTTGG |
| probe-a    | AACCACTGCAATCACATCGG                                   |

---
