# Supplementary material for: An ATP-Binding Cassette Transporter, LaABCB11, Contributes to Alkaloid Transport in Lycoris aurea
Source: MDPI journal article supplement (doi:10.3390/ijms222111458), 2021-10-24
Supplement: s1 [file s1]

## Supplemental information 1

>LaABCB11

ATGGGTATTGAAGAAGAGAAGGACAAAATTAGTCCTTCAGTCAATGGATCAAATGAGCCA  
TCTTCTAGTAATTCAACGGTGAAAGAAGCAAACGGCGAGAAGAGCAATGAGAAAAGGGA  
CGAGGCGAAGTACACCGTTCCGTTCTACAAGCTGTTGCTTTTGCAGACTCGACAGATGTG  
CTTCTCATGACCGCAGGCTCGATTGGAGCTGTGGCTAATGGGCTTGCATTGCCTCTCATGA  
CGGTGCTCTTTGGAAATTTGATCCAATCTTTCGGAGGAGCTACTAATATTCATGATGTGGT  
TCATAGGGTTTCCAAGGTCTGTCTTGAGTTTGTCTACTTGGCTGTGGGATCAGGGATAGCG  
TCATTTTTTCAGGTGTCTTGTTGGATGGCGACGGGGGAGAGGCAGGCTGCAAGAATAAGG  
AATTTGTATTTGAAAACCATATTACGGCAAGAAATCGCATTCTTTGACAAGGAAACAAAT  
ACTGGAGAGGTTGTGGGGAGAATGTCAGGTGATACTGTTCTCATTCAAGATGCCATGGGT  
GAAAAGGTTGGCAAGTTCATCCAGCTAGTATCAACATTCTTTGGGGGTTTTGTAGTTGCAT  
TTGTTCAAGGATGGCTTCTCACTCTTGTGATGCTAACCACAATCCCGCTCCTCGTGATAGC  
AGGCGCGGCAATGGGAGCCGCAATATCAAAAATGGCATCGATGGGGCAAACAGCTTATG  
CGAGGCAGCTGTTGTCGTTGAGCAAACAATCGGTTCAATTAGAACAGTTGCATCTTTTAC  
TGGCGAAAAGCAATCGGTCATAAAGTACAAGAAATCTCTCAAGAGTGCTTATGAGTCTAG  
TGTTGAGAGAGTCTCGCTTCAGGATTAGGTCTTGGTACTGTAATGCTAATCATGTTTTGC  
GGCTACGGGTTGGGAATTTGGTATGGGTCAAATTTGATATTGGATAAAGGCTACACTGGT  
GCTGATGTAATCAACGTGATATTTGCAGTCTTGACAGGCTCATTTTCCTTGGGACAGGCAT  
CTCCATGCTTGACGGCATTTCAGCAGGGGCAAGCCGCGGCATTCAAGATGTTTGAAACGA  
TCAACAGAAAGCCAGAGATAGATGCAACCGATCCAACAGGGAAAAAACTAGATGACATA  
GTTGGAGATGTAGAATTTAAAGATGTTTACTTCAGCTATCCAACAAGACAAGATGAGCAA  
ATATTTAGAGGATTTTCTCTATTTCATACAGCATGGCACGACTGTAGCTTTGGTCGGAGAGA  
GTGGAAGCGGGAAGTCTACAGTTATAAGTCTGATTGAGAGATTTTATGACGCACAAGCAG  
GTGAAGTTCTTATAGATGGCATAAACCTTAAGGAATTTCAACTCAAATGGATCAGAGGTA  
AAATTGGGCTAGTGAGTCAAGAGCCCGTACTCTTTGCATCAAGCATTAGAGATAACATAG  
CCTATGGAAAGGAAGGGGCAACCACTGAAGAAATTAGAGCCGCAACTGAGCTTGCTAAT  
GCTTCAAAGTTTATAGACAAGATGCCACAGGGACTTGACACCATGGTTGGTGAGCATGGG  
ACCCAGCTATCCGGGGGCCAAAAACAAAGGATTGCGATTGCAAGAGCTATTCTGAAAGAC  
CCACGAATTCTGCTTCTTGATGAAGCCACCAGTGCTTTGGATGCAGAATCTGAAAGGATA  
GTGCAAGAGGCACTTGATAGGATAATGGCAAACCGTACGACTGTCATTGTTGCTCATCGC  
TTGAGTACAGTGAGAAATGCAGATACTATTGCTGTTATACACAGAGGTTCAATTGTGGAA  
AAAGGTTTCGATTCCGAGCTACTAAAGGATTCAAATGGTGCTTATTGCCAACTCATACGCT  
TGCAAGAAATGAATCAAAATTCTGACCATCCATCTCAGTCCAGCAAGGCTAAGCTCAATC  
TTTCATCTGACGCTGGGAGGCGCTCTAGCAGACATATGTCTCTAAATCGTTCAATAAGCCG  
TGAATCATCTTCTATAGGCAACAGTAGTCGCTCTTTCACATTACCCTTAGGATTGCCCCCA  
GGAATTGATCTTCAAGAGACCAAATCAGAGGGAGCAACAAACACTGAGGTTCCCTCCAGCA  
CAAGTAAAGGAAGTATCACTCCGACGCCTTGCTACCTCAATAAACCTGAAATTCCAGTTC  
TTATAATTGGTGTGATCTCTGCTGTTGTTAATGGGCTTGTGTTTCCCATATTTGGACTACTC  
TTATCGAGCGTGATAAATACATTCTACCAACCACCTGATAAACTCAAAAAGGATTCAAAA  
TTTTGGTCGTTGTTGTTTGTCTATATTTGGTGTGATTTCTTTCCTAGCACTTCCCGCTAGA  
TACTTTTTTGGAGTGGCCGGAGCCAAATTAATACAAAGGATAAGATCAATGACCTTCGAG  
AAGGTGGTACATATGGAGGTTGCTTGGTTTGATGAACCTGAAAATTCAGTGGAGCAATT  
GGCGCAAGATTATCAGCTGATGCAGCGACGGTTCGGGGCCTCGTGGGTGATGCACTTGCT

TTAGTTGTTTCAGAACATTACAACCTTTAATTGCTGGTTTGGTAATTGCTTTTGTGCAAACCTG  
GCAATTGTCTTTTATTATCTTGGCTCTGATACCACTCATAGGCATCAACGGATATATCCAA  
GTGAAGTTCATGACTGGATTTAGTGCTGATGCAAAGATGATGTATGAGGAGGCTAGTCAG  
GTTGCCAATGATGCCGTGGGAAGTATAAGAACCGTTGCTTCTTCTCAGCTGAAGATAAA  
GTGATGGAACCTTTACAAGAAGAAATGTGAAGGACCTATGAGGACTGGAATTCGGCAAGG  
ATTGATTAGCGGTATTGGATTTGGAGCCTCCTTCTTCTTGCTATTTTGTGTTTATGCAACCA  
GTTTTTATGCGGGAGCTCGCCTTGTGGAGGATGGAAAGACTACATTTGGAAAAGTTTTTAA  
GGTTTTCTTGTCTTTCTATGGCAGCTATTGGAATTTCTCAATCAAGCTCCCTAGCGCCAG  
ACTCTAGCAAAGCCAAATCCGCTACAGCTTCTGTGTTTGTGCTTCTTGATCGTAAGTCAAA  
GATTGATCCAAGCGATGAATCCGGGATGACACTAGAAAGATTAAAGGGAAACATTGAGTT  
CCGGCATGTCAGTTTCAAGTATCCAACAAGGCCACATGTGCAGATTTTCCAAGACTTGTGC  
TTGTGATTTCATGCTGGAAAGACTGTTGCATTGGTTGGCGAGAGCGGAAGTGGGAAATCA  
ACTGCGATAGCATTGTTACAAAGATTTTATGATCCCCGATTCCGGTCATATACTGATAGATG  
GAATGGAGATTGAGAAATTTCAAGGTGCGGTGGCTAAGGCAGCAAATGGGTCTGGTTAGTC  
AAGAACCAGCTTTGTTTAATGACACGATTCGAGCCAACATTGCCTACGGGAAAGAAGGAG  
ATGCCACCGAGGCTGAAGTTGTAGCTGCGGCCGAGTCAGCAAATGCCACAAGTTCATAT  
GCAGTTTACAACAGGGTTATGACACGGTGGTTGGAGAGCGAGGGATCCAGCTATCAGGTG  
GTCAAAGCAACGGGTGGCGATTGCACGTGCCATTGTGAAAGAGCCAAAAATTCTACTTC  
TAGACGAAGCAACAAGCGCGCTCGATGCTGAATCTGAACGAGTGGTTCAAGATGCTTTAG  
ATCGAGTCATGGTCAACCGTACAACAATAGTGATCGCACATCGGTTGTCTACGATCAGAG  
GTGCCGATGTGATTGCAGTGGTTAAGAATGGAATGATTATTGAGAAAGGAAACCATGATT  
CATTGATCAATATCAAGGATGGTGCTTATGCATCATTAGTTGCACTTCACACAAATTCTTC  
TACGTAG

>ΔLaABCBI1

ATGGGTATTGAAGAAGAGAAGGACAAAATTAGTCCTTCAGTCAATGGATCAAATGAGC  
CATCTTCTAGTAATTC AACGGTGAAAGAAGCAAACGGCGAGAAGAGCAATGAGAAAA  
GGGACGAGGCGAAGTACACCGTTCCGTTCTACAAGCTGTTTCGCTTTTGCAGACTCGAC  
AGATGTGCTTCTCATGACCGCAGGCTCGATTGGAGCTGTGGCTAATGGGCTTGCATTGC  
CTCTCATGACGGTGCTCTTTGGAAATTTGATCCAATCTTTCGAGAGGAGCTACTAATATTC  
ATGATGTGGTTCATAGGGTTTCCAAGGTCTGTCTTGAGTTTGTCTACTTGGCTGTGGGA  
TCAGGGATAGCGTCATTTTTTTCAGGTGTCTTGTGGATGGCGACGGGGGAGAGGCAGG  
CTGCAAGAATAAGGAATTTGTATTTGAAAACCATATTACGGCAAGAAATCGCATTCTTT  
GACAAGGAAACAAATACTGGAGAGGTTGTGGGGAGAATGTCAGGTGATACTGTTCTC  
ATTCAAGATGCCATGGGTGAAAAGGTTGGCAAGTTCATCCAGCTAGTATCAACATTCTT  
TGGGGGTTTTGTAGTTGCATTTGTTCAAGGATGGCTTCTCACTCTTGTGATGCTAACCA  
CAATCCCGCTCCTCGTGATAGCAGGCGCGGCAATGGGAGCCGCAATATCAAAAATGGC  
ATCGATGGGGCAAACAGCTTATGCGGAGGCAGCTGTTGTCGTTGAGCAAACAATCGGT  
TCAATTAGAACAGTTGCATCTTTTACTGGCGAAAAGCAATCGGTCATAAAGTACAAGA  
AATCTCTCAAGAGTGCTTATGAGTCTAGTGTTCGAGAGAGTCTCGCTTCAGGATTAGGT  
CTTGGTACTGTAATGCTAATCATGTTTTGCGGCTACGGGTGGGAATTTGGTATGGGTCA  
AAATTGATATTGGATAAAGGCTACACTGGTGCTGATGTAATCAACGTGATATTTGCAGTC  
TTGACAGGCTCATTTTCCTTGGGACAGGCATCTCCATGCTTGACGGCATTTCAGCAGG  
GCAAGCCGCGGCATTCAAGATGTTTGAAACGATCAACAGAAAGCCAGAGATAGATGC

AACCGATCCAACAGGGAAAAAACTAGATGACATAGTTGGAGATGTAGAATTTAAAGAT  
GTTTACTTCAGCTATCCAACAAGACAAGATGAGCAAATATTTAGAGGATTTTCTCTATTC  
ATACAGCATGGCACGACTGTAGCTTTGGTCACAGTTATAAGTCTGATTGAGAGATTTTAT  
GACGCACAAGCAGGTGAAGTTCTTATAGATGGCATAAACCTTAAGGAATTTCAACTCA  
AATGGATCAGAGGTAAAATTGGGCTAGTGAGTCAAGAGCCCGTACTCTTTGCATCAAG  
CATTAGAGATAACATAGCCTATGGAAAGGAAGGGGCAACCACTGAAGAAATTAGAGCC  
GCAACTGAGCTTGCTAATGCTTCAAAGTTTATAGACAAGATGCCACAGGGACTTGACA  
CCATGGTTGGTGAGCATGGGACCCAGCTATCCGGGGGCCAAAAACAAAGGATTGCGAT  
TGCAAGAGCTATTCTGAAAGACCCACGAGCCACCAGTGCTTTGGATGCAGAATCTGAA  
AGGATAGTGCAAGAGGCACTTGATAGGATAATGGCAAACCGTACGACTGTCATTGTTG  
CTCATCGCTTGAGTACAGTGAGAAATGCAGATACTATTGCTGTTATACACAGAGGTTCA  
ATTGTGGAAAAAGGTTTCGCATTCCGAGCTACTAAAGGATTCAAATGGTGCTTATTGCCA  
ACTCATACGCTTGCAAGAAATGAATCAAAATTCTGACCATCCATCTCAGTCCAGCAAGG  
CTAAGCTCAATCTTTCATCTGACGCTGGGAGGCGCTCTAGCAGACATATGTCTCTAAAT  
CGTTCAATAAGCCGTGAATCATCTTCTATAGGCAACAGTAGTCGCTCTTTCACATTACCC  
TTAGGATTGCCCCCAGGAATTGATCTTCAAGAGACCAAATCAGAGGGAGCAACAAACA  
CTGAGGTTCCCTCCAGCACAAGTAAAGGAAGTATCACTCCGACGCCTTGCTTACCTCAA  
TAAACCTGAAATTCCAGTTCTTATAATTGGTGTGATCTCTGCTGTTGTTAATGGGCTTGT  
GTTTCCCATATTTGGACTACTCTTATCGAGCGTGATAAATACATTCTACCAACCACCTGA  
TAAACTCAAAAAGGATTCAAAATTTTGGTCGTTGTTGTTTGGCTATATTTGGTGTGATTTT  
TTTCCTAGCACTTCCCGCTAGAACTTACTTTTTTGGAGTGGCCGGAGCCAAATTAATAC  
AAAGGATAAGATCAATGACCTTCGAGAAGGTGGTACATATGGAGGTTGCTTGGTTTGAT  
GAACCTGAAAATTCTAGTGAGCAATTGGCGCAAGATTATCAGCTGATGCAGCGACGG  
TTCGGGGCCTCGTGGGTGATGCACTTGCTTTAGTTGTTTCAAGAACATTACAACCTTAAAT  
GCTGGTTTGGTAATTGCTTTTGTGCAAACTGGCAATTGTCTTTTATTATCTTGGCTCTG  
ATACCACTCATAGGCATCAACGGATATATCCAAGTGAAGTTCATGACTGGATTTAGTGCT  
GATGCAAAGATGATGTATGAGGAGGCTAGTCAGGTTGCCAATGATGCCGTGGGAAGTA  
TAAGAACCGTTGCTTCTTCTCAGCTGAAGATAAAGTGATGGAACCTTACAAGAAGAA  
ATGTGAAGGACCTATGAGGACTGGAATTCGGCAAGGATTGATTAGCGGTATTGGATTTG  
GAGCCTCCTTCTTCTTGCTATTTTGTGTTTATGCAACCAGTTTTTATGCGGGAGCTCGCC  
TTGTGGAGGATGGAAAGACTACATTTGGAAAAGTTTTTAAGGTTTTCTTTGCTCTTTCT  
ATGGCAGCTATTGGAATTTCTCAATCAAGCTCCCTAGCGCCAGACTCTAGCAAAGCCAA  
ATCCGCTACAGCTTCTGTGTTTGCTGTTCTTGATCGTAAAGTCAAAGATTGATCCAAGCG  
ATGAATCCGGGATGACACTAGAAAGATTAAAGGGAAACATTGAGTTCCGGCATGTCAG  
TTTCAAGTATCCAACAAGGCCACATGTGCAGATTTTCCAAGACTTGTGCTTGTGCGATT  
ATGCTGGAAAGACTGTTGCATTGGTTACTGCGATAGCATTGTTACAAAGATTTTATGATC  
CCGATTCCGGTCATATACTGATAGATGGAATGGAGATTGAGAAATTCAGGTGCGGTGG  
CTAAGGCAGCAAATGGGTCTGGTTAGTCAAGAACCAGCTTTGTTTAATGACACGATT  
GAGCCAACATTGCCTACGGGAAAGAAGGAGATGCCACCGAGGCTGAAGTTGTAGCTG  
CGGCCGAGTCAGCAAATGCCACAAGTTCATATGCAGTTTACAACAGGGTTATGACAC  
GGTGGTTGGAGAGCGAGGGATCCAGCTATCAGGTGGTCAAAAGCAACGGGTGGCGAT  
TGCACGTGCCATTGTGAAAGAGCCAAAAGCAACAAGCGCGCTCGATGCTGAATCTGA  
ACGAGTGGTTCAAGATGCTTTAGATCGAGTCATGGTCAACCGTACAACAATAGTGATCG  
CACATCGGTTGTCTACGATCAGAGGTGCCGATGTGATTGCAGTGGTTAAGAATGGAATG

ATTATTGAGAAAGGAAACCATGATTCATTGATCAATATCAAGGATGGTGCTTATGCATCA  
TTAGTTGCACTTCACACAAATTCTTCTACGTAG

> probe

GGTTATGACACGGTGGTTGGAGAGCGAGGGATCCAGCTATCAGGTGGTCAAAGCAA  
CGGGTGGCGATTGCACGTGCCATTGTGAAAGAGCCAAAAATTCTACTTCTAGACGAAG  
CAACAAGCGCGCTCGATGCTGAATCTGAACGAGTGGTTCAAGATGCTTTAGATCGAGT  
CATGGTCAACCGTACAACAATAGTGATCGCACATCGGTTGTCTACGATCAGAGGTGCCG  
ATGTGATTGCAGTGGTT
